# Supplementary material for: CaGrid Workflow Toolkit: A taverna based workflow tool for cancer grid
Source: Springer Nature journal article supplement (doi:10.1186/1471-2105-11-542), 2010-11-02
Supplement: 12859_2010_4125_MOESM1_ESM.pdf [file 12859_2010_4125_MOESM1_ESM.pdf]

(1)

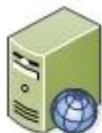

Index

(2)

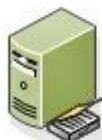

Metadata

(3)

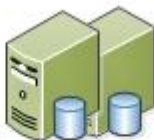

Data services

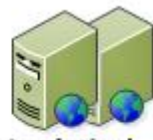

Analytical services

## caGrid Workflow Toolkit

(1) Service discovery

(2) Data access

(3) Service invocation

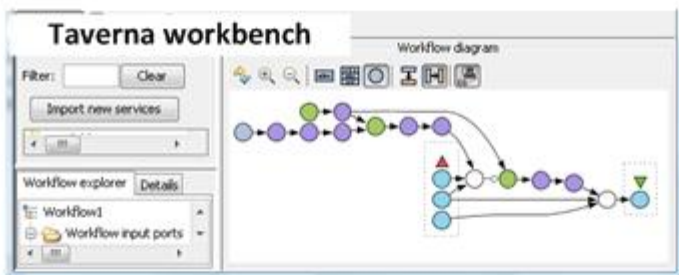

(5) Knowledge sharing

(4) Security enforcement

(5)

**my** experiment

(4)

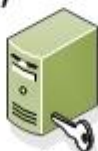

authen.

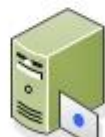

credential delegation

Security services
