# Supplementary material for: CaGrid Workflow Toolkit: A taverna based workflow tool for cancer grid
Source: Springer Nature journal article supplement (doi:10.1186/1471-2105-11-542), 2010-11-02
Supplement: 12859_2010_4125_MOESM3_ESM.pdf [file 12859_2010_4125_MOESM3_ESM.pdf]

caGrid Services Search

Select grid: NCI Production CaGrid 1.3

| Service query criteria: | Service query value: |
|-------------------------|----------------------|
| Search String           | array                |
| Research Center         | NCICB                |
| Concept Code            | C44282               |
| None                    |                      |
| None                    |                      |

OK Cancel

- SpreadsheetImport - A service that imports data from spreadsheets
- String constant - A string value that you can set
- Local services
- Biomart @ <http://www.biomart.org/biomart/martservice>
- Biomoby @ <http://moby.ucalgary.ca/moby/MOBY-Central.pl>
- NCI Production CaGrid 1.3
  - National Cancer Institute Center for Bioinformatics
    - WSDL @ <http://array.nci.nih.gov:80/wsrf/services/cagrid/CaArraySvc?wsdl>
      - createFileTransfer
      - getDataSet
      - getDesignDetails
      - GetMultipleResourceProperties
      - GetResourceProperty
      - getServiceSecurityMetadata
      - query
      - QueryResourceProperties
      - readFile
