# Supplementary material for: CaGrid Workflow Toolkit: A taverna based workflow tool for cancer grid
Source: Springer Nature journal article supplement (doi:10.1186/1471-2105-11-542), 2010-11-02

Workflow input ports

experiment\_id ▲

CQL\_Builder

query

extract\_a\_file

createFileTransfer\_caArrayFile

createFileTransfer\_input

createFileTransfer

createFileTransfer\_output

createFileTransfer\_TransferServiceContextReference

fileName

workingDir

CaGrid\_Transfer\_Activity

Workflow output ports

resultFile ▼

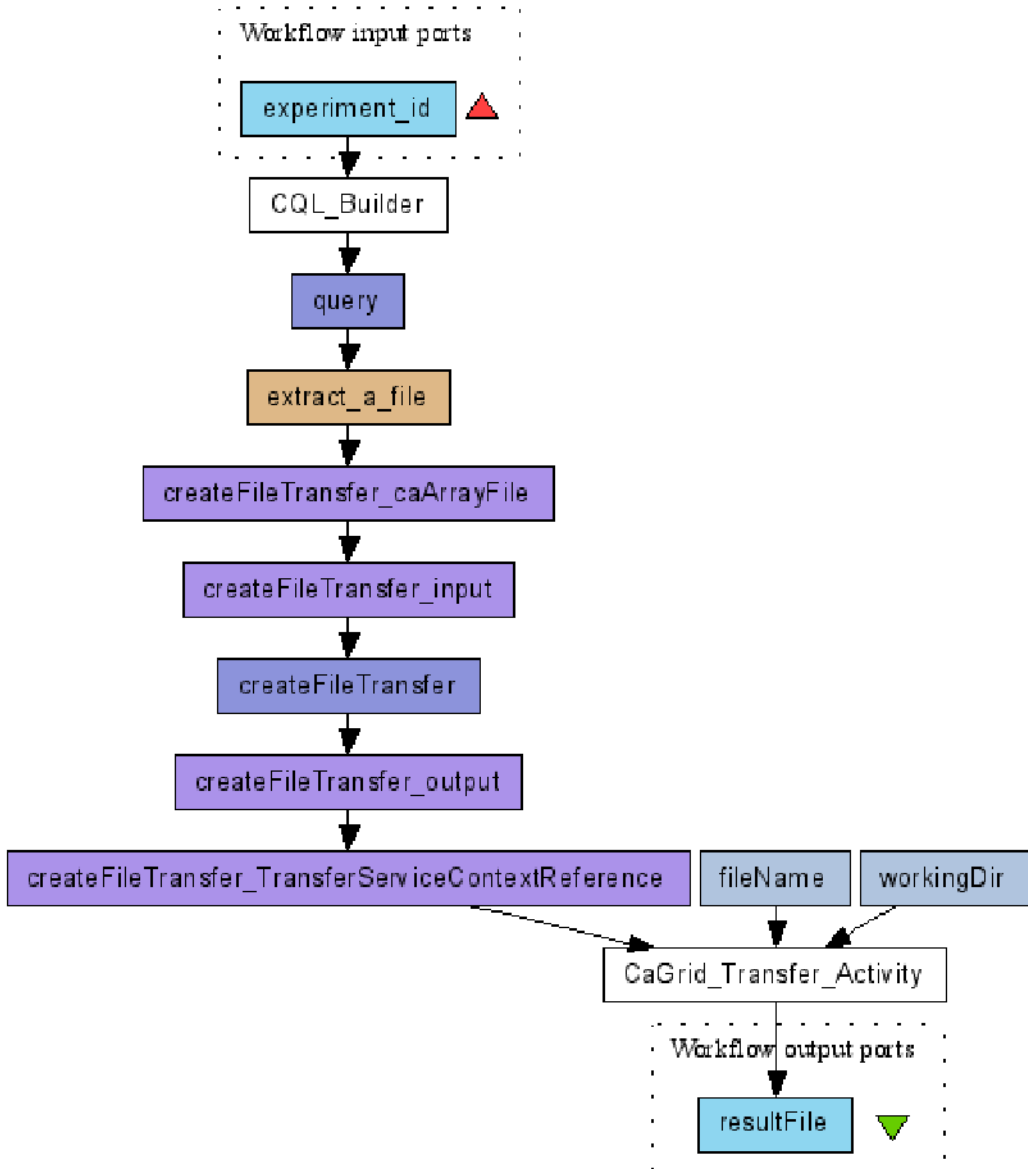

Supplement: 12859_2010_4125_MOESM4_ESM.pdf [file 12859_2010_4125_MOESM4_ESM.pdf]
