# Supplementary material for: CaGrid Workflow Toolkit: A taverna based workflow tool for cancer grid
Source: Springer Nature journal article supplement (doi:10.1186/1471-2105-11-542), 2010-11-02
Supplement: 12859_2010_4125_MOESM7_ESM.pdf [file 12859_2010_4125_MOESM7_ESM.pdf]

Workflow input ports

EXPID ▲

Extract\_Microarray

Preprocess\_Microarray

Predict\_Lymphoma\_Type

Workflow output ports

Result\_CSV ▼

| SampleName    | TrueClass | SVMPredClass | KNNPredClass |
|---------------|-----------|--------------|--------------|
| testSample_0  | DLBCL     | DLBCL        | DLBCL        |
| testSample_1  | FL        | FL           | FL           |
| testSample_2  | DLBCL     | DLBCL        | DLBCL        |
| testSample_3  | FL        | FL           | FL           |
| testSample_4  | DLBCL     | FL           | DLBCL        |
| testSample_5  | DLBCL     | DLBCL        | DLBCL        |
| testSample_6  | FL        | FL           | FL           |
| testSample_7  | DLBCL     | DLBCL        | DLBCL        |
| testSample_8  | DLBCL     | DLBCL        | FL           |
| testSample_9  | DLBCL     | DLBCL        | DLBCL        |
| testSample_10 | DLBCL     | DLBCL        | DLBCL        |
| testSample_11 | FL        | FL           | FL           |
| testSample_12 | DLBCL     | DLBCL        | DLBCL        |
| testSample_13 | DLBCL     | DLBCL        | DLBCL        |
| testSample_14 | DLBCL     | DLBCL        | DLBCL        |
| testSample_15 | DLBCL     | DLBCL        | DLBCL        |
| testSample_16 | DLBCL     | DLBCL        | DLBCL        |
| testSample_17 | DLBCL     | DLBCL        | FL           |
| testSample_18 | DLBCL     | DLBCL        | DLBCL        |
| testSample_19 | FL        | FL           | FL           |
| testSample_20 | DLBCL     | DLBCL        | DLBCL        |
| testSample_21 | DLBCL     | DLBCL        | DLBCL        |
| testSample_22 | DLBCL     | DLBCL        | DLBCL        |
| testSample_23 | DLBCL     | DLBCL        | DLBCL        |
| testSample_24 | DLBCL     | DLBCL        | DLBCL        |
| testSample_25 | DLBCL     | DLBCL        | DLBCL        |
