# Supplementary material for: CaGrid Workflow Toolkit: A taverna based workflow tool for cancer grid
Source: Springer Nature journal article supplement (doi:10.1186/1471-2105-11-542), 2010-11-02

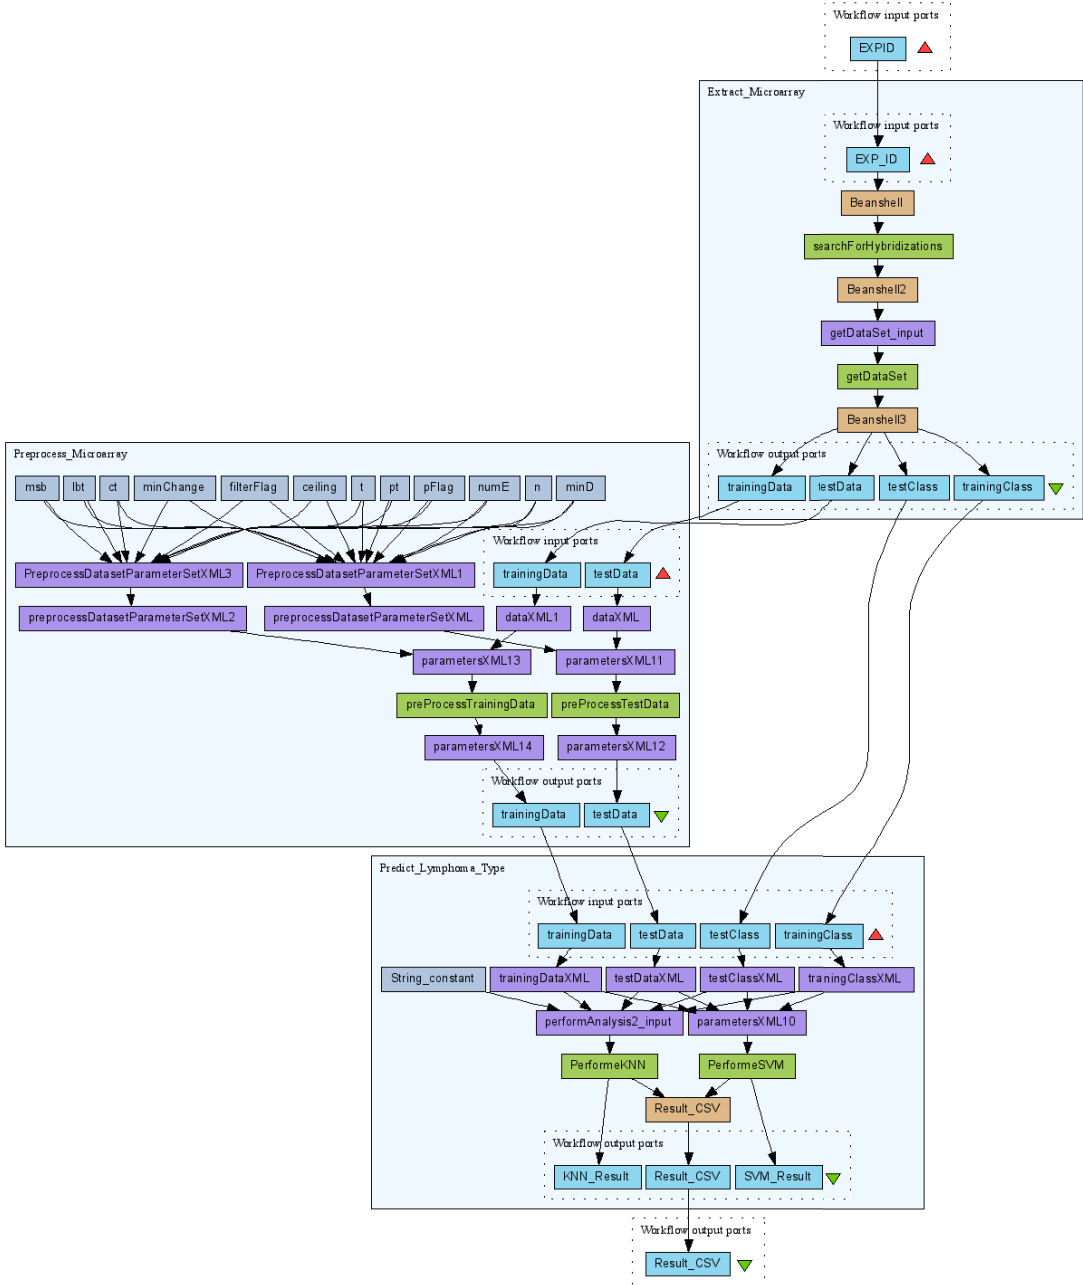

Supplement: 12859_2010_4125_MOESM8_ESM.pdf [file 12859_2010_4125_MOESM8_ESM.pdf]
